# Supplementary material for: Throwing light on dark diversity of vascular plants in China: predicting the distribution of dark and threatened species under global climate change
Source: PeerJ journal article supplement (doi:10.7717/peerj.6731), 2019-04-09

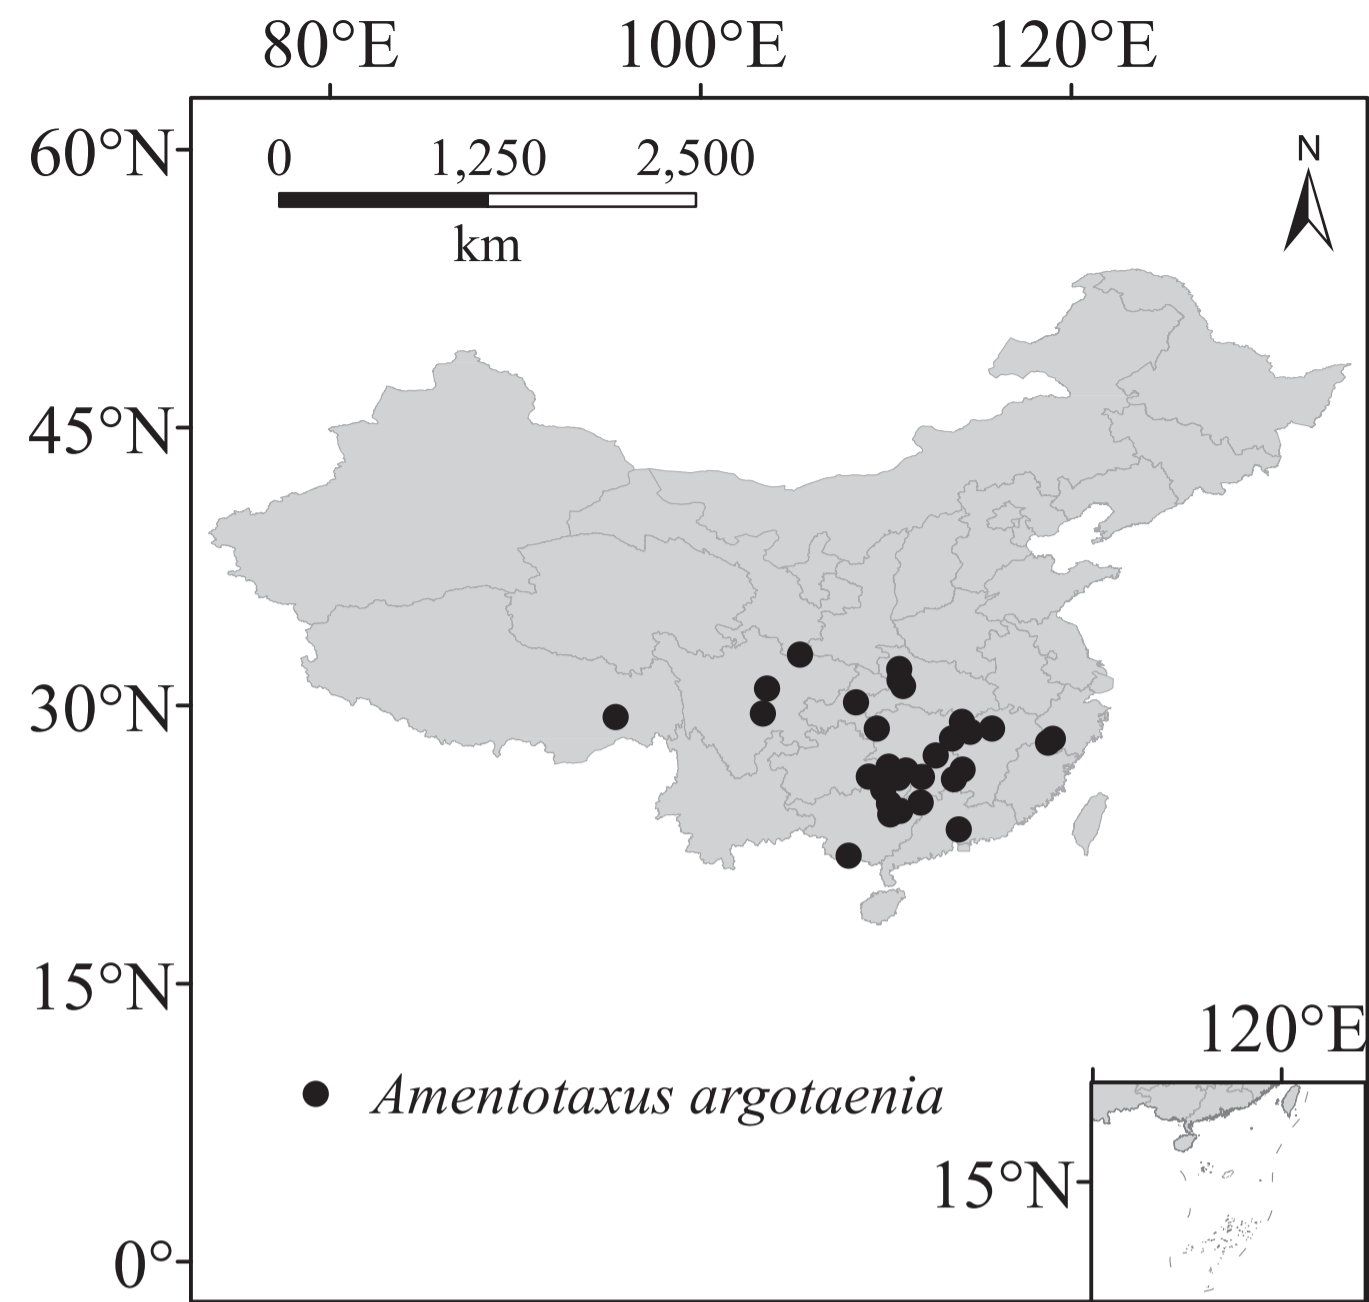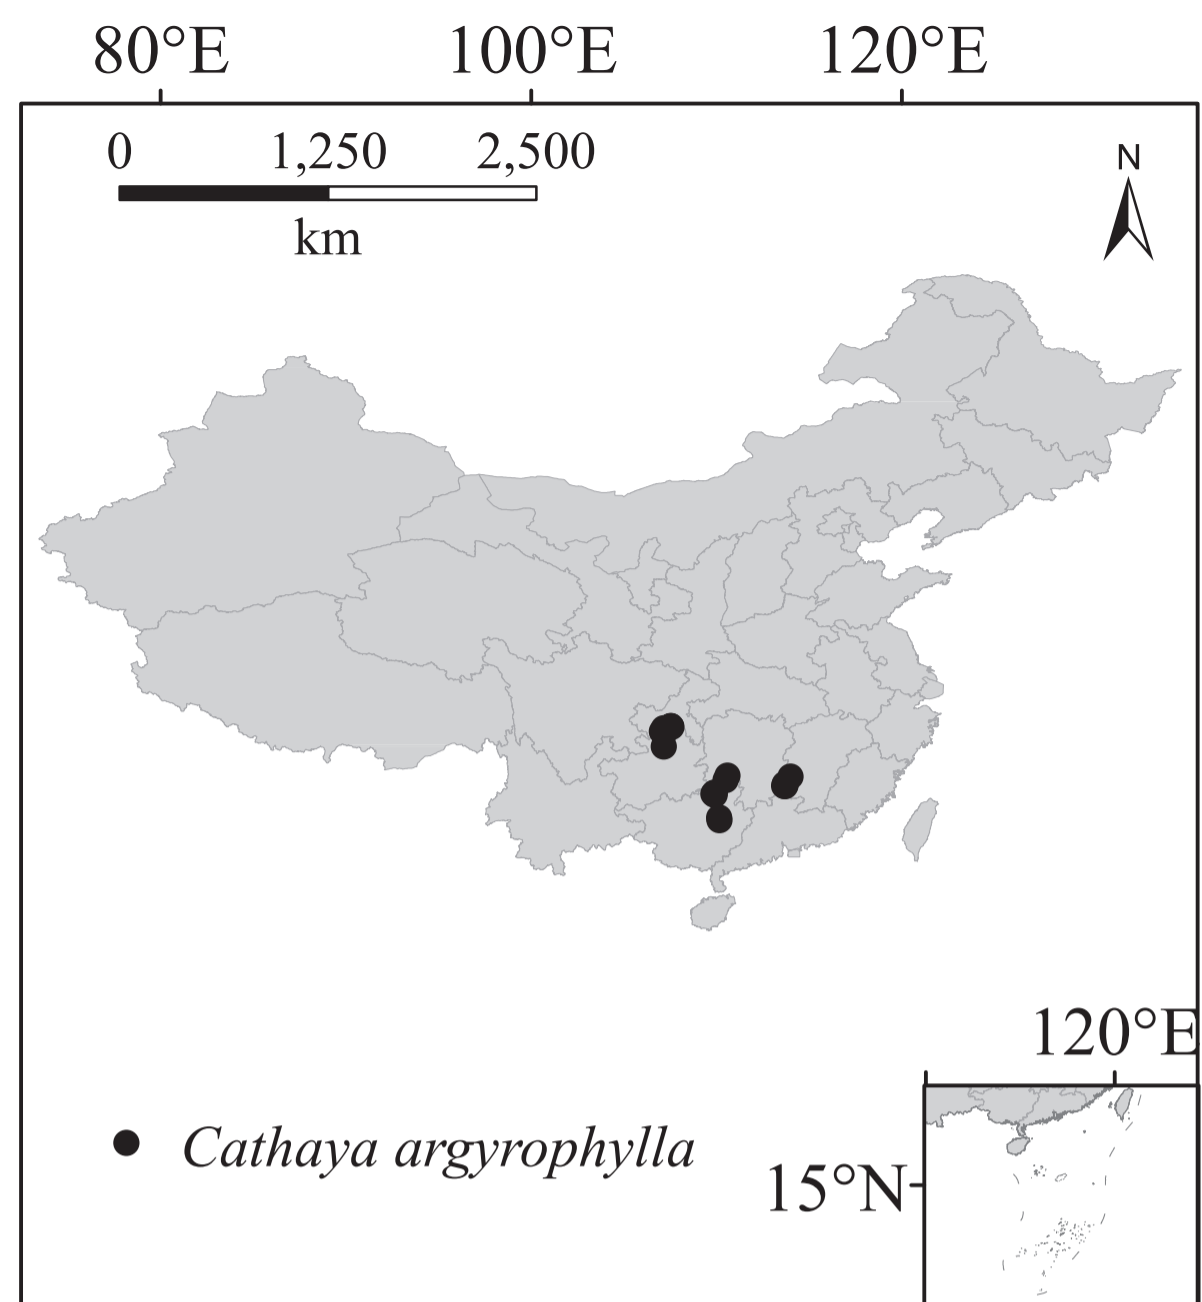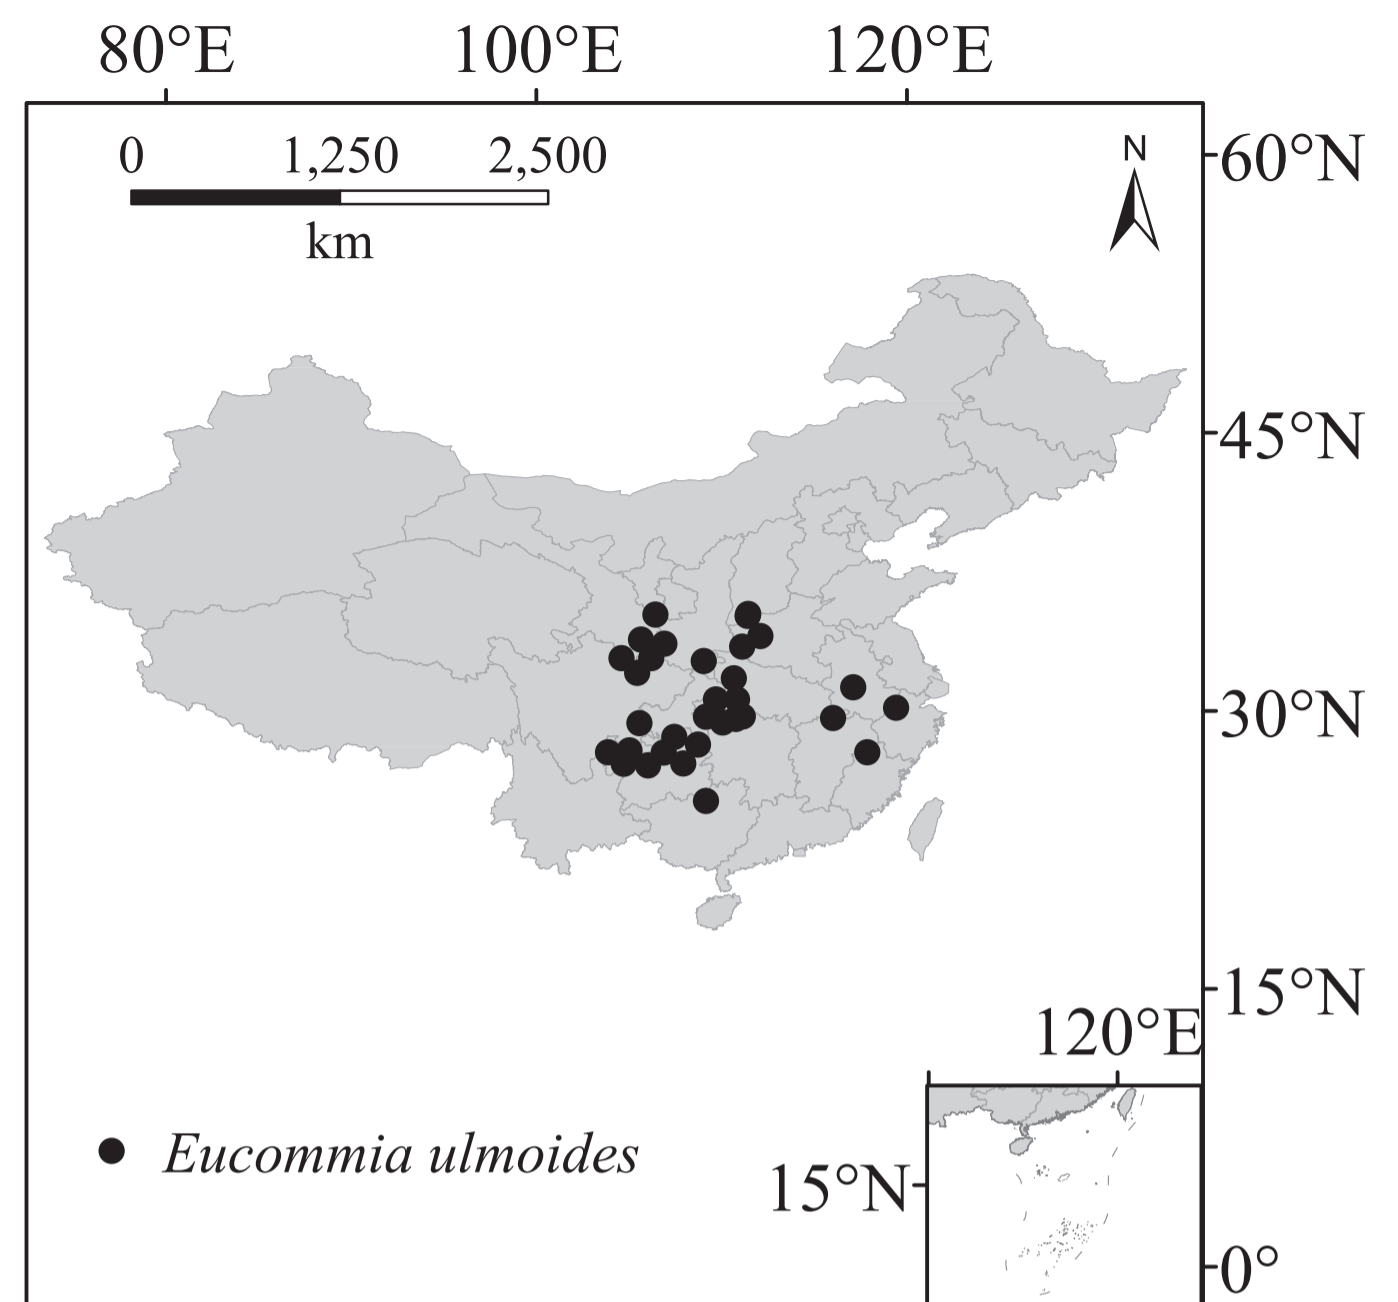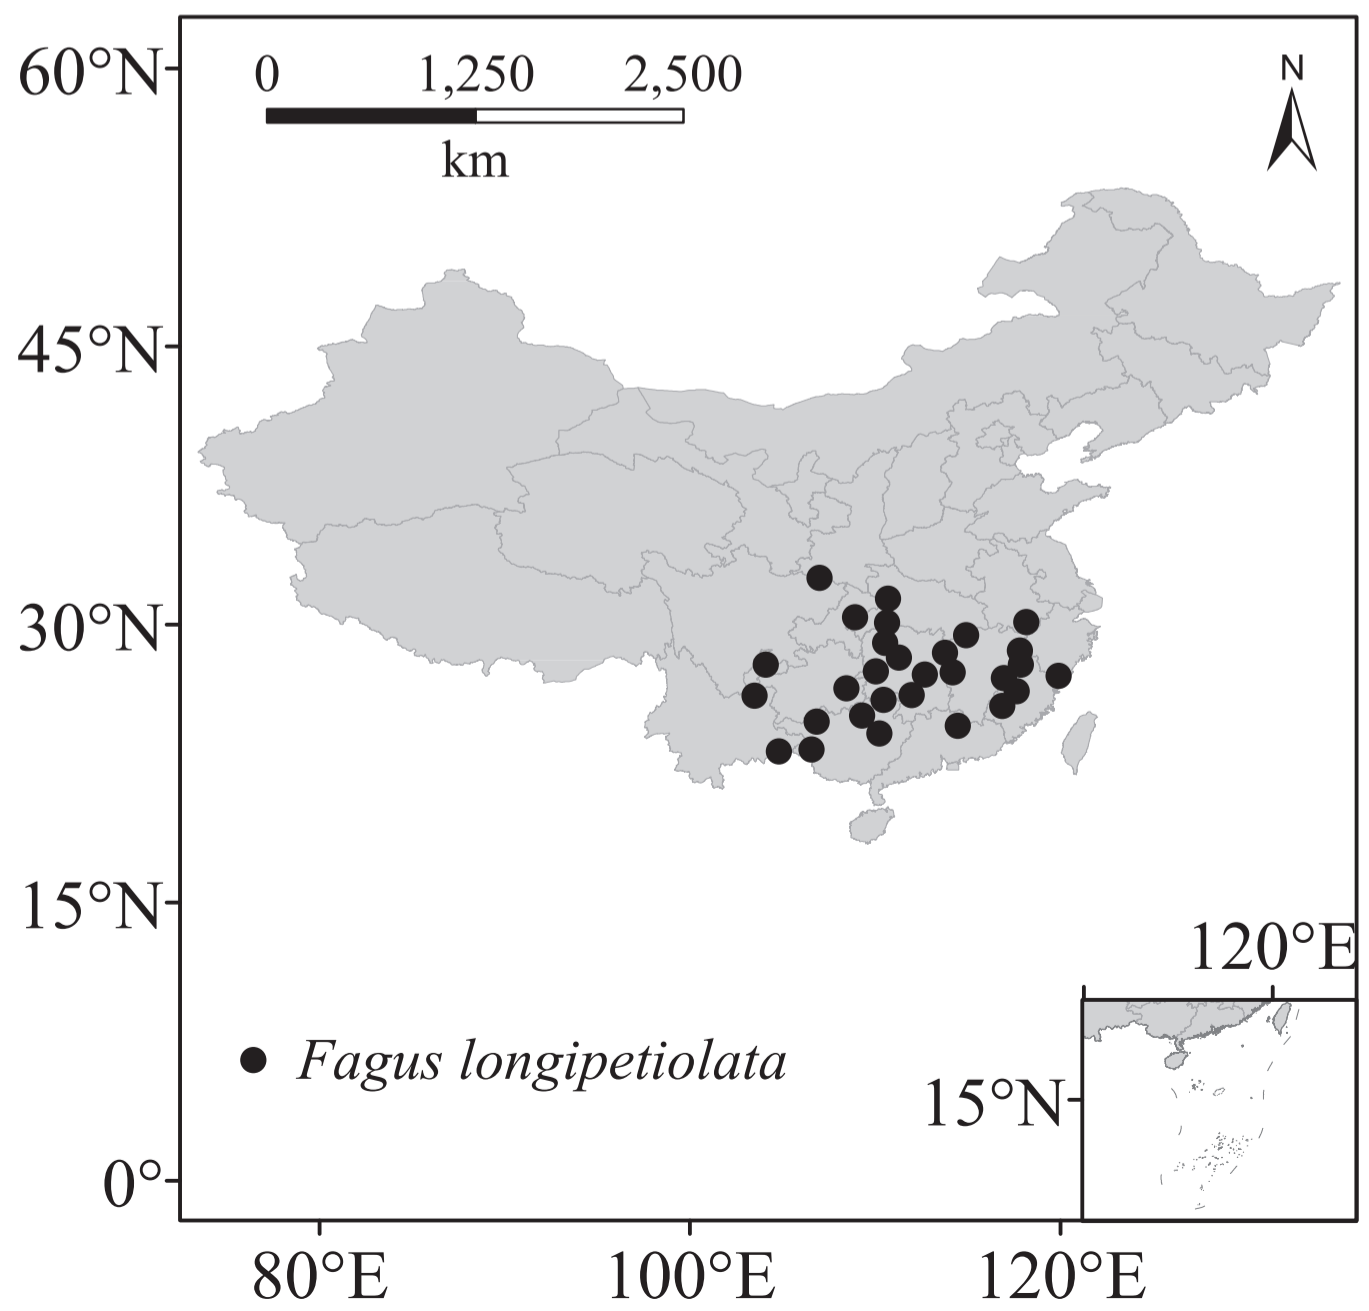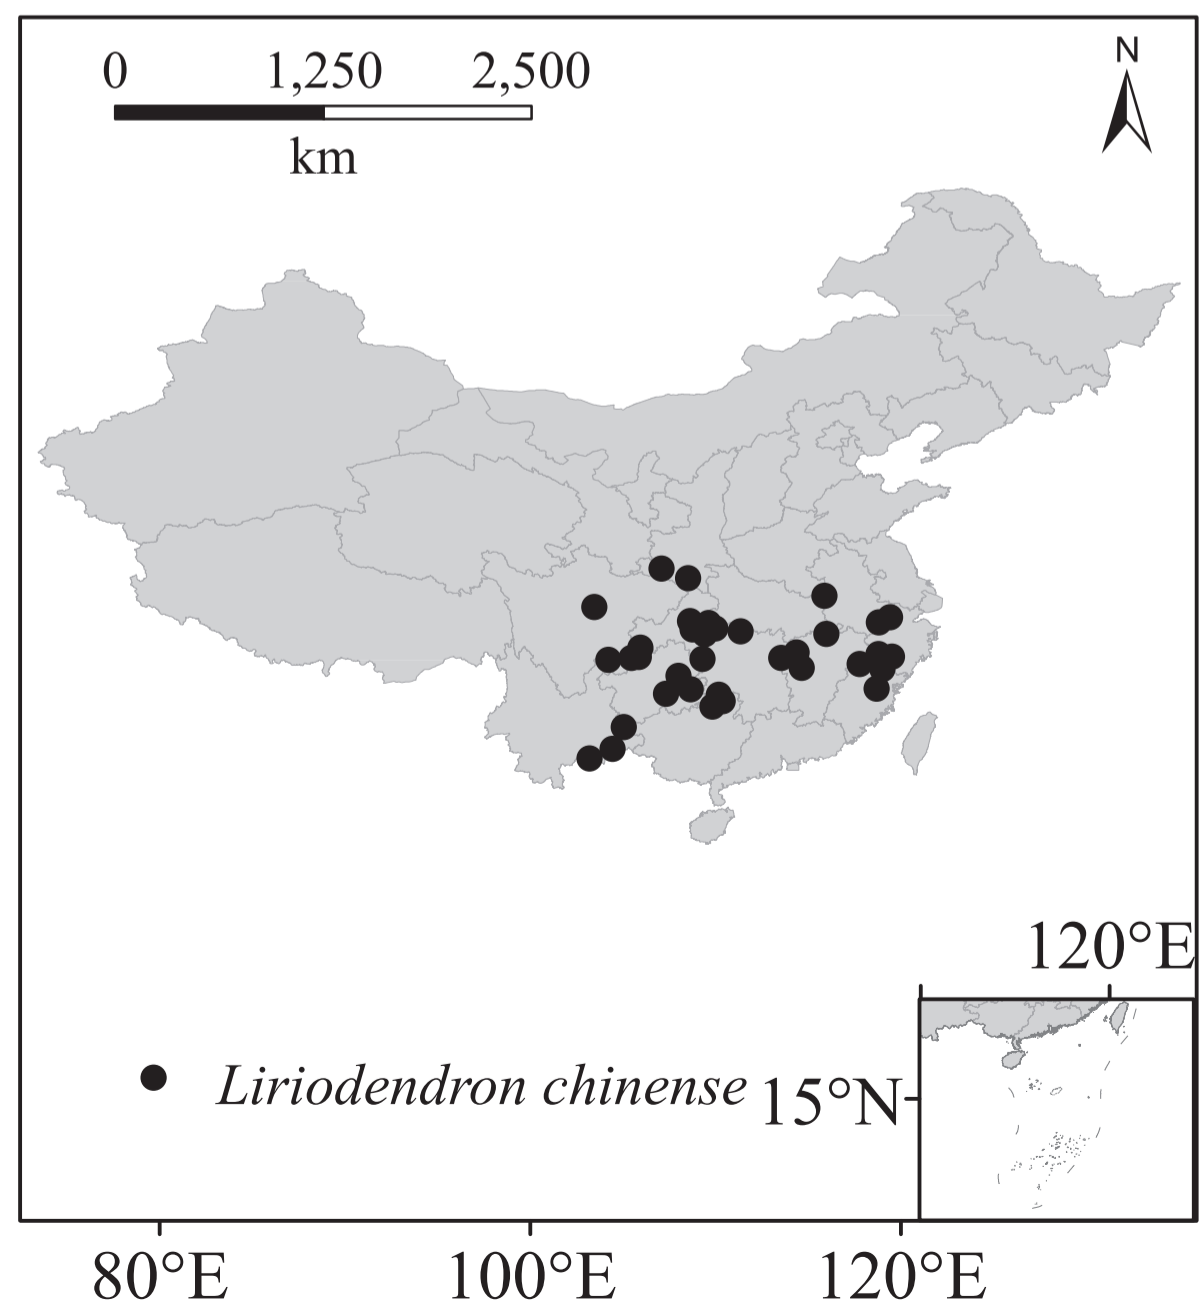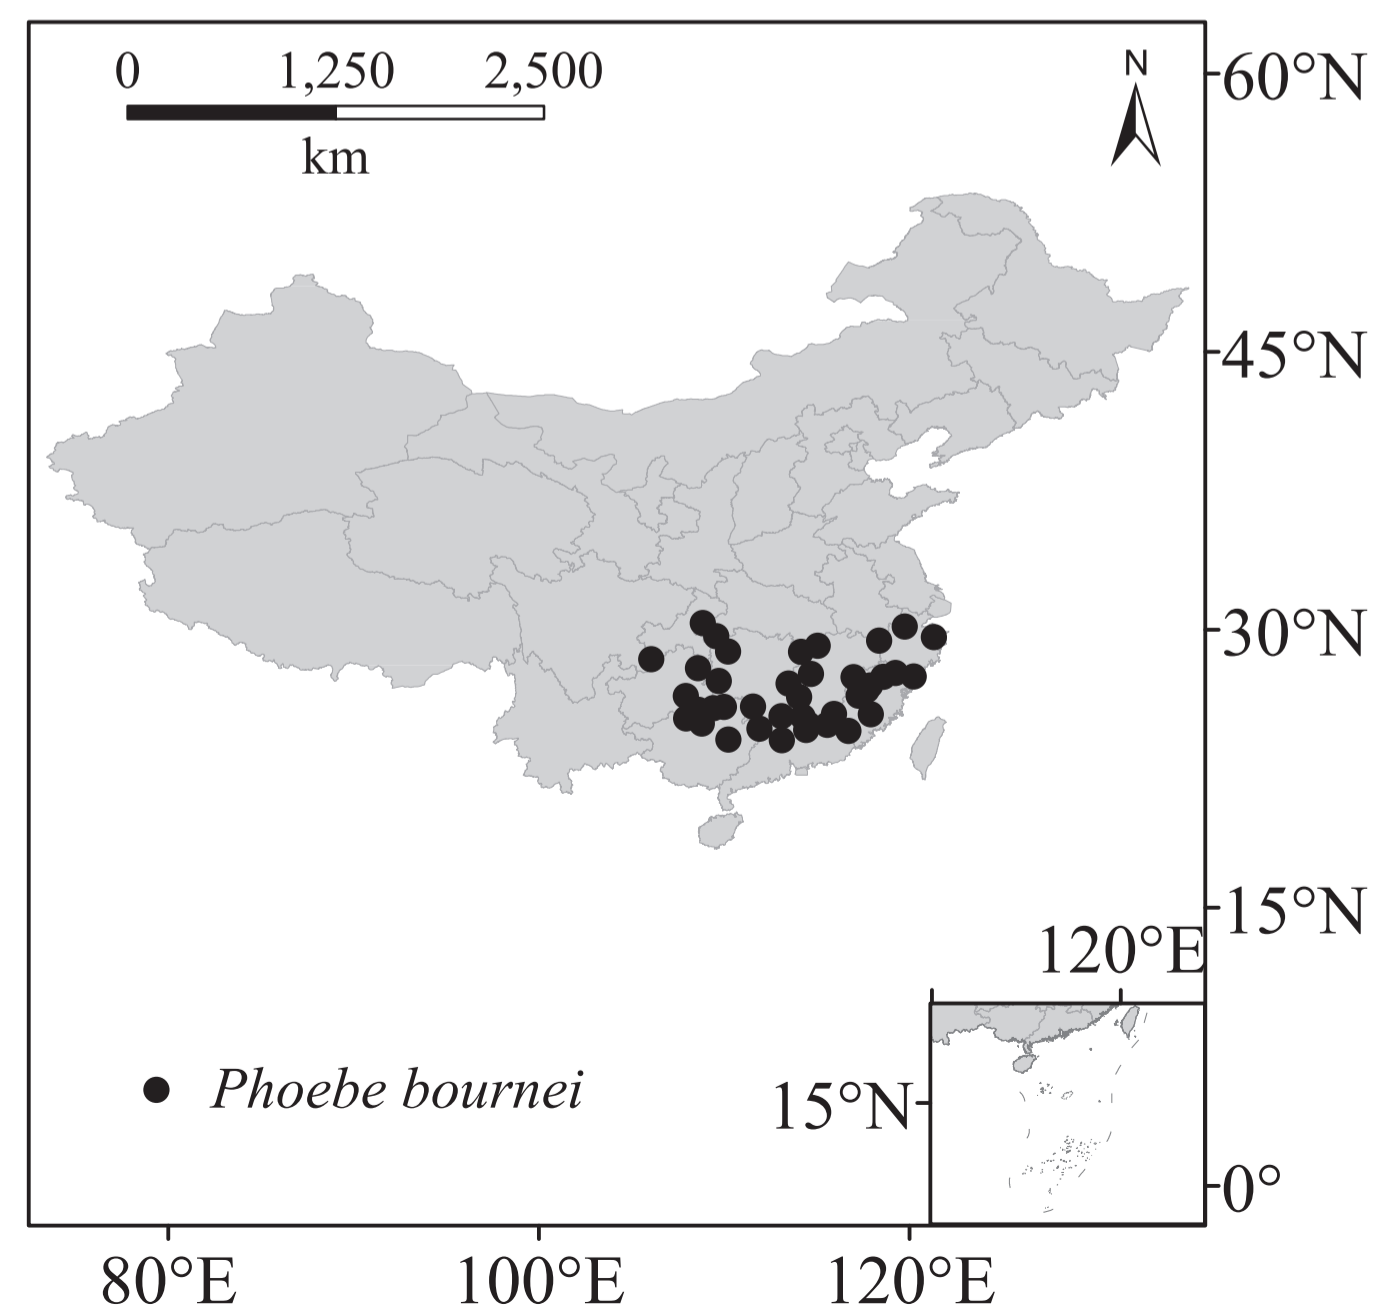

Supplement: Fig._S1.pdf [file Fig._S1.pdf]
